# Supplementary material for: Post-stroke individual preferences for lower limb rehabilitation exoskeletons
Source: Research Square preprint supplement (doi:10.21203/rs.3.rs-8620015/v1), 2026-02-04
Supplement: Supplementary file 1 [file a360307a9d78bd390d785e37.docx]

**Appendix**

## Appendix 1: Attributes and Levels Used in the DCE

| **Attribute Description** | Levels |
| --- | --- |
| **Device Control Mode**: The patient's ability to initiate movement or be assisted by the exoskeleton. | **- Active:** The patient initiates and controls the movements, and the exoskeleton provides passive support. - **Semi-passive**: The device partially initiates the movement, sharing motor effort with the patient. - **Passive**: The exoskeleton fully guides the movement without active contribution from the patient. |
| **Comfort of Use**: Overall feeling of the patient during use (pressure, support, potential discomfort). | - **Low**: Wearing the device is perceived as uncomfortable, possibly causing pressure points or discomfort. - **High**: Wearing the device is considered comfortable, with good adaptation to the patient’s morphology. |
| **Degrees of Freedom (DoF)**: The device’s capacity to mobilize several leg joints (hip, knee, ankle). | - **Limited**: Only one or two joints are mobilized by the exoskeleton. - **Extended**: Most or all major leg joints are mobilized in a coordinated way. |
| **Feedback** (Information provided to the patient): Information given to the patient during the session about effort or progress. | - **Basic information**: Basic messages or visual signals about movement execution. - **Detailed information**: Personalized and real-time data (graphs, voice feedback, performance analysis). |
| **Price (Monthly Out-of-Pocket Cost for the Patient)**: The estimated financial contribution in euros to use the device. | **- €0 - €50 - €100** |

## Appendix 2: An example of a choice scenario


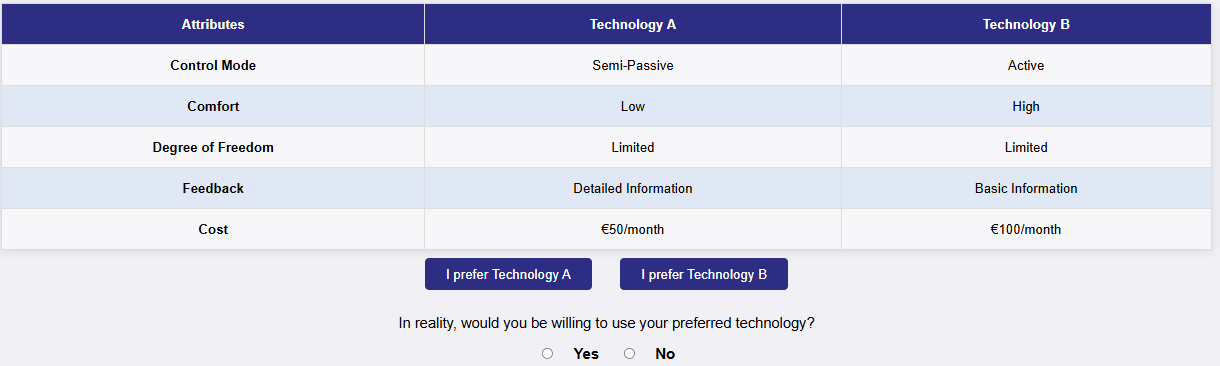


## Appendix 3: Design Correlation Matrix

##
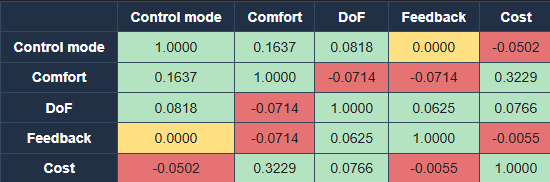


## Appendix 4: Balance of Levels in the Experimental Design

| **Attributes and Levels** | **Number of Occurrences (%)** |
| --- | --- |
| ***Mode:*** |  |
| *Passive* | *10 (31.24)* |
| *Semi-passive* | *11 (34.38)* |
| *Active* | *11 (34.38)* |
| ***Comfort:*** |  |
| *Low* | *16 (50)* |
| *High* | *16 (50)* |
| ***Degrees of Freedom (DoF):*** |  |
| *Limited* | *16 (50)* |
| *Increased* | *16 (50)* |
| ***Feedback:*** |  |
| *Basic* | *16 (50)* |
| *Detailed* | *16 (50)* |
| ***Cost (out-of-pocket):*** |  |
| *€0 / month (fully covered)* | *11 (34.38)* |
| *€50 / month* | *11 (34.38)* |
| *€100 / month* | *10 (31.24)* |

## Appendix 5: Respondents Excluded from the Modelling

| **ID** | Block | Scenario 1 | Scenario 3 | Scenario 9 | Inconsistency |
| --- | --- | --- | --- | --- | --- |
| 3 | A | **A** | B | **B** | Inconsistency Block A: 1 ≠ 9 |
| 27 | A | **B** | A | **A** | Inconsistency Block A: 1 ≠ 9 |
| 44 | B | A | **A** | **B** | Inconsistency Block B: 3 ≠ 9 |
| 49 | A | **A** | A | **B** | Inconsistency Block A: 1 ≠ 9 |
| 52 | B | A | **A** | **B** | Inconsistency Block B: 3 ≠ 9 |

## Appendix 6: Summary of Respondents' Understanding, Opinions, and Attribute Consideration

| **Variable** | **Category** | **Frequency (n)** | **Percentage (%)** |
| --- | --- | --- | --- |
| ***Understanding*** | *I didn't understand anything.* | *2* | *3.45* |
|  | *I didn't understand some of the questions* | *2* | *3.45* |
|  | *I understood all the questions well* | *93.10* | *93.10* |
| ***Opinion*** | *No opinion* | *6* | *10.34* |
|  | *Quite easy* | *30* | *51.72* |
|  | *Very easy* | *15* | *25.86* |
|  | *quite difficult* | *5* | *8.62* |
|  | *Very difficult* | *2* | *3.45* |
| ***Attribute Considered*** | *Of a single attribute* | *7* | *12.07* |
|  | *Of all the attributes* | *23* | *39.66* |
|  | *Of some attributes* | *28* | *48.28* |
| ***Exhaustiveness*** | *No opinion* | *8* | *13.79* |
|  | *I somewhat agree* | *43* | *74.14* |
|  | *Completely agree* | *5* | *8.62* |
|  | *Disagree* | *2* | *3.45* |

## Appendix 7: Variation in Choice Probabilities Based on Changes in Attribute Levels

|  | | |
| --- | --- | --- |
| **(** | **Formula** | **Value** |
|  |  | -0.59 |
|  |  | -0.87 |
|  |  | -0.31 |
|  |  | 0.20 |
|  |  | 0.34 |
