# Supplementary material for: Post-stroke individual preferences for lower limb rehabilitation exoskeletons
Source: Research Square preprint supplement (doi:10.21203/rs.3.rs-8620015/v1), 2026-02-04
Supplement: Supplementary file 2 [file cbb8fc6c536c6a516e41b355.docx]

***Table 1: Description of the Study Population***

| **Variable** | **Category** | **Frequency (n)** | **Percentage (%)** |
| --- | --- | --- | --- |
| ***Sex*** | *F* | *22* | *37.93* |
|  | *M* | *36* | *62.07* |
| ***Age*** | *< 25 years* | *1* | *1.72* |
|  | *25 – 50 years* | *5* | *8.62* |
|  | *50 – 65 years* | *23* | *39.66* |
|  | *> 65 years* | *29* | *50.00* |
| ***Weight*** | *< 50 kg* | *1* | *1.72* |
|  | *50 – 70 kg* | *24* | *41.38* |
|  | *70 – 100 kg* | *26* | *44.83* |
|  | *> 100 kg* | *7* | *12.07* |
| ***Annual income*** | *< €10,000* | *7* | *12.07* |
|  | *€10,000 – €20,000* | *28* | *48.28* |
|  | *> €20,000* | *21* | *36.21* |
|  | *N/A* | *2* | *3.45* |
| ***Time since stroke*** | *< 6 months* | *16* | *28.57* |
|  | *6 – 12 months* | *13* | *23.21* |
|  | *> 12 months* | *27* | *48.21* |
| ***Self-assessed health status*** | *Good* | *26* | *44.83* |
|  | *Excellent* | *1* | *1.72* |
|  | *Poor* | *3* | *5.17* |
|  | *Fair* | *28* | *48.28* |
| ***Financial participation*** | *No* | *13* | *22.41* |
|  | *Yes* | *45* | *77.59* |
| ***Preferred payment method*** | *N/A* | *15* | *25.86* |
|  | *Monthly payment* | *38* | *65.52* |
|  | *Per session payment* | *5* | *8.62* |
| ***Willingness To Pay*** | *€50 - €100 / month* | *22* | *37.93* |
|  | *< €50 / month* | *9* | *15.52* |
|  | *> €100 / month* | *7* | *12.07* |
|  | *N/A* | *20* | *34.48* |

***Table 2: Conditional Logit Model for Respondents (Number of observations n=848)***

| **Attributes and Levels** | **Betas** | **Coefficients (95% CI)** | **p** | **WTP** |
| --- | --- | --- | --- | --- |
| ***Price: Out-of-pocket cost*** | β1 | -0.027 (-0.03 - -0.02) | 0.000*** | - |
| ***Control mode:*** |  |  |  |  |
| *Active (Ref)* | - | - | - | - |
| *Passive* | β2 | -0.63 (-1.24 - -0.01) | 0.05* | -22.94 (-44.66 - -1.23) |
| *Semi-passive* | β3 | 0.40 (-0.17 - 0.96) | 0.17 | 14.51 (-5.61 - 34.63) |
| ***Comfort:*** |  |  |  |  |
| *Low (Ref)* | - | - | - | - |
| *High* | β4 | -0.339 (-0.96 - 0.28) | 0.28 | - |
| ***Degree of Freedom (DoF):*** |  |  |  |  |
| *Limited (Ref)* | - | - | - | - |
| *Improved* | β5 | 0.70 (0.20 - 1.21) | 0.01** | 25.71 (9.61 - 41.81) |
| ***Feedback:*** |  |  |  |  |
| *Basic* | - | - | - | - |
| *Detailed* | β6 | -0.36 (-0.74 - 0.03) | 0.07* | -12.97 (-26.23 - 0.25) |
| ***ASC*** | β7 | -0.05 (-0.28 - 0.17) | 0.64 | - |

* p < 0.10, ** p < 0.05, *** p < 0.01

***Table 3: Marginal Rate of Substitution***

| **Marginal Rate of Substitution (MRS)** | **Value [95% CI]** | **p** |
| --- | --- | --- |
| **Passive Mode vs. Increased DoF** | -0.892 [-1.770 *–* -0.0147] | 0.046** |
| **Passive Mode vs. Detailed Feedback** | 1.767 [-1.126 *–* 4.660] | 0.231 |
| **Increased DoF vs. Detailed Feedback** | -1.980 [-4.189 *–* 0.229] | 0.079* |

* p < 0.10, ** p < 0.05, *** p < 0.01

***Table 4: Mixte Logit Model for Respondents (Number of observations n=848)***

| **Betas** | | | | **SD** | |
| --- | --- | --- | --- | --- | --- |
| **Attributes and Levels** | **Betas** | **Coefficients (95% CI)** | **p-value** | **SD (95% CI)** | **p** |
| ***Cost: Out-of-pocket*** |  |  |  |  |  |
|  | *β1* | ***-0.03 (-0.04 – -0.02)*** | *0.00**** | *-* | *-* |
| ***Control Mode:*** |  |  |  |  |  |
| *Active (Ref)* | *-* | *-* | *-* | *-* | *-* |
| *Passive* | *β2* | *-0.54 (-1.40 – 0.33)* | *0.22* | ***1.58 (0.54 – 2.62)*** | *0.01**** |
| *Semi-passive* | *β3* | ***0.66 (0.02 – 1.30)*** | *0.04*** | *0.12 (-2.87 – 3.11)* | *0.94* |
| ***Comfort:*** |  |  |  |  |  |
| *Low (Ref)* | *-* | *-* | *-* | *-* | *-* |
| *High* | *β4* | *-0.29 (-1.08 – 0.49)* | *0.46* | *0.92 (-0.46 – 2.30)* | *0.19* |
| ***Degree of Freedom:*** |  |  |  |  |  |
| *Limited (Ref)* | *-* | *-* | *-* | *-* | *-* |
| *Increased* | *β5* | ***0.67 (0.07 – 1.27)*** | *0.03*** | *0.01 (-0.77 – 0.78)* | *0.99* |
| ***Feedback:*** |  |  |  |  |  |
| *Basic (Ref)* | *-* | *-* | *-* | *-* | *-* |
| *Detailed* | *β6* | ***-0.40 (-0.82 – 0.01)*** | *0.06** | *0.29 (-0.82 – 1.40)* | *0.61* |
| *ASC: β7* | *β7* | *- 0.06 (-0.33 – 0.21)* | *0.66* | *-* | *-* |

* p < 0.10, ** p < 0.05, *** p < 0.01
